# Supplementary material
Source: Springer Nature journal article supplement (https://www.springermedizin.de/resource/supplementary/13054_2011_9554_MOESM1_ESM.pdf/9706462)
Supplement: MOESM1 [file 9706462]



**36h Maximum from  
Early Sepsis  
Diagnosis to Obtain  
Consent and  
Randomize**

**After  
Randomization 12h  
to Start Enteral  
Feeding**

**Receive  
Randomized  
Nutrition for 7 Days  
– Goal 75% of BEE x  
1.3**
